# Supplementary material for: Insight into the ecology of vaginal bacteria through integrative analyses of metagenomic and metatranscriptomic data
Source: PubMed Central journal article supplement (PMC8886902; doi:10.1186/s13059-022-02635-9), 2022-03-01

## **Supplementary File 1**

Plots displaying the longitudinal taxonomic composition of the metagenome and metatranscriptome for each of the 39 subjects.

- Phylotype**
- Lactobacillus\_crispatus
  - Lactobacillus\_jensenii
  - Lactobacillus\_iners
  - Bifidobacterium\_breve
  - Gardnerella\_vaginalis
  - Bifidobacterium\_longum
  - Sneathia\_amnii
  - Prevotella\_bivia
  - Prevotella\_amnii
  - Streptococcus\_agalactiae
  - Prevotella\_timonensis
  - Prevotella\_corporis
  - BVAB1
  - Lactobacillus\_kefiranofaciens
  - Lactobacillus\_gasseri
  - Lactobacillus\_coleohominis
  - Prevotella\_buccalis
  - Finegoldia\_magna
  - Sneathia\_sanguinegens
  - Staphylococcus\_lugdunensis
  - Megaspheara\_genomosp.
  - Peptostreptococcus\_anaerobius
  - Mageeibacillus\_indolicus
  - other

AYAC02

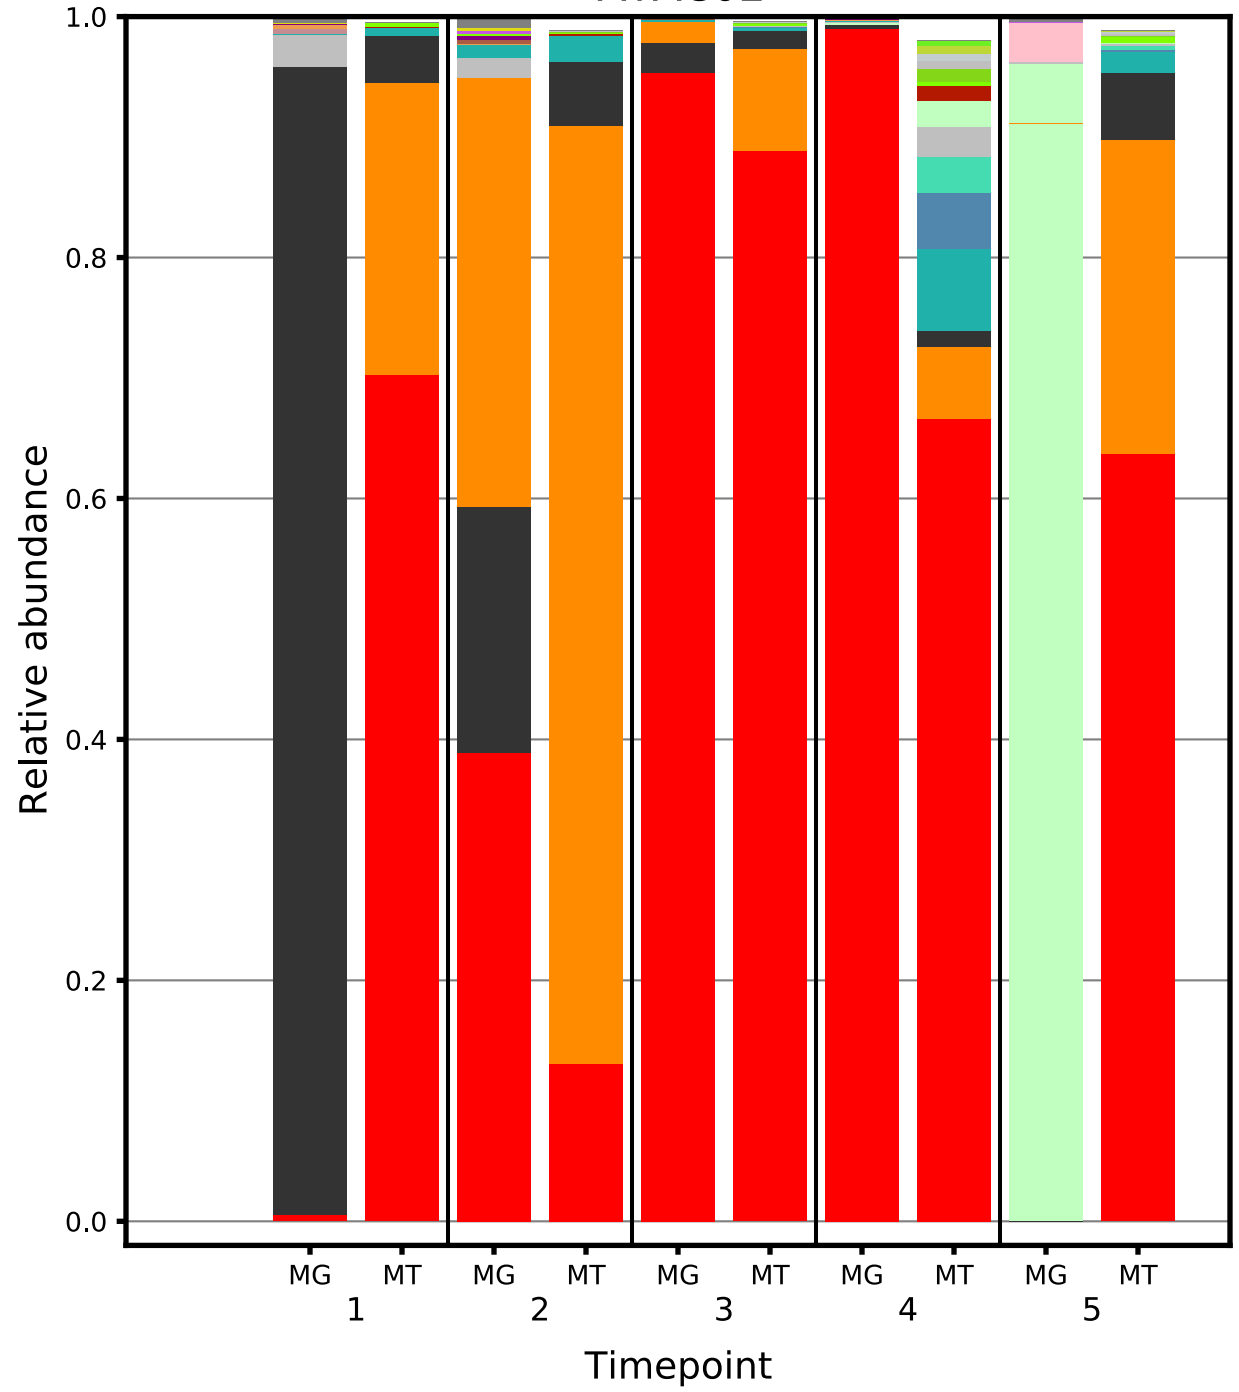







Phylotype

- Lactobacillus\_crispatus
- Lactobacillus\_iners
- Lactobacillus\_jensenii
- Propionibacterium\_sp.
- Escherichia\_coli
- Gardnerella\_vaginalis
- Sneathia\_amnii
- Lactobacillus\_coleohominis
- Prevotella\_bivia
- Bifidobacterium\_breve
- BVAB1
- Prevotella\_timonensis
- Streptococcus\_anginosus
- Atopobium\_vaginae
- Corynebacterium\_aurimucosum
- Prevotella\_amnii
- Lactobacillus\_gasseri
- Sneathia\_sanguinegens
- Mageeibacillus\_indolicus
- Finegoldia\_magna
- Megaspheara\_genomosp.
- other

AYAC10

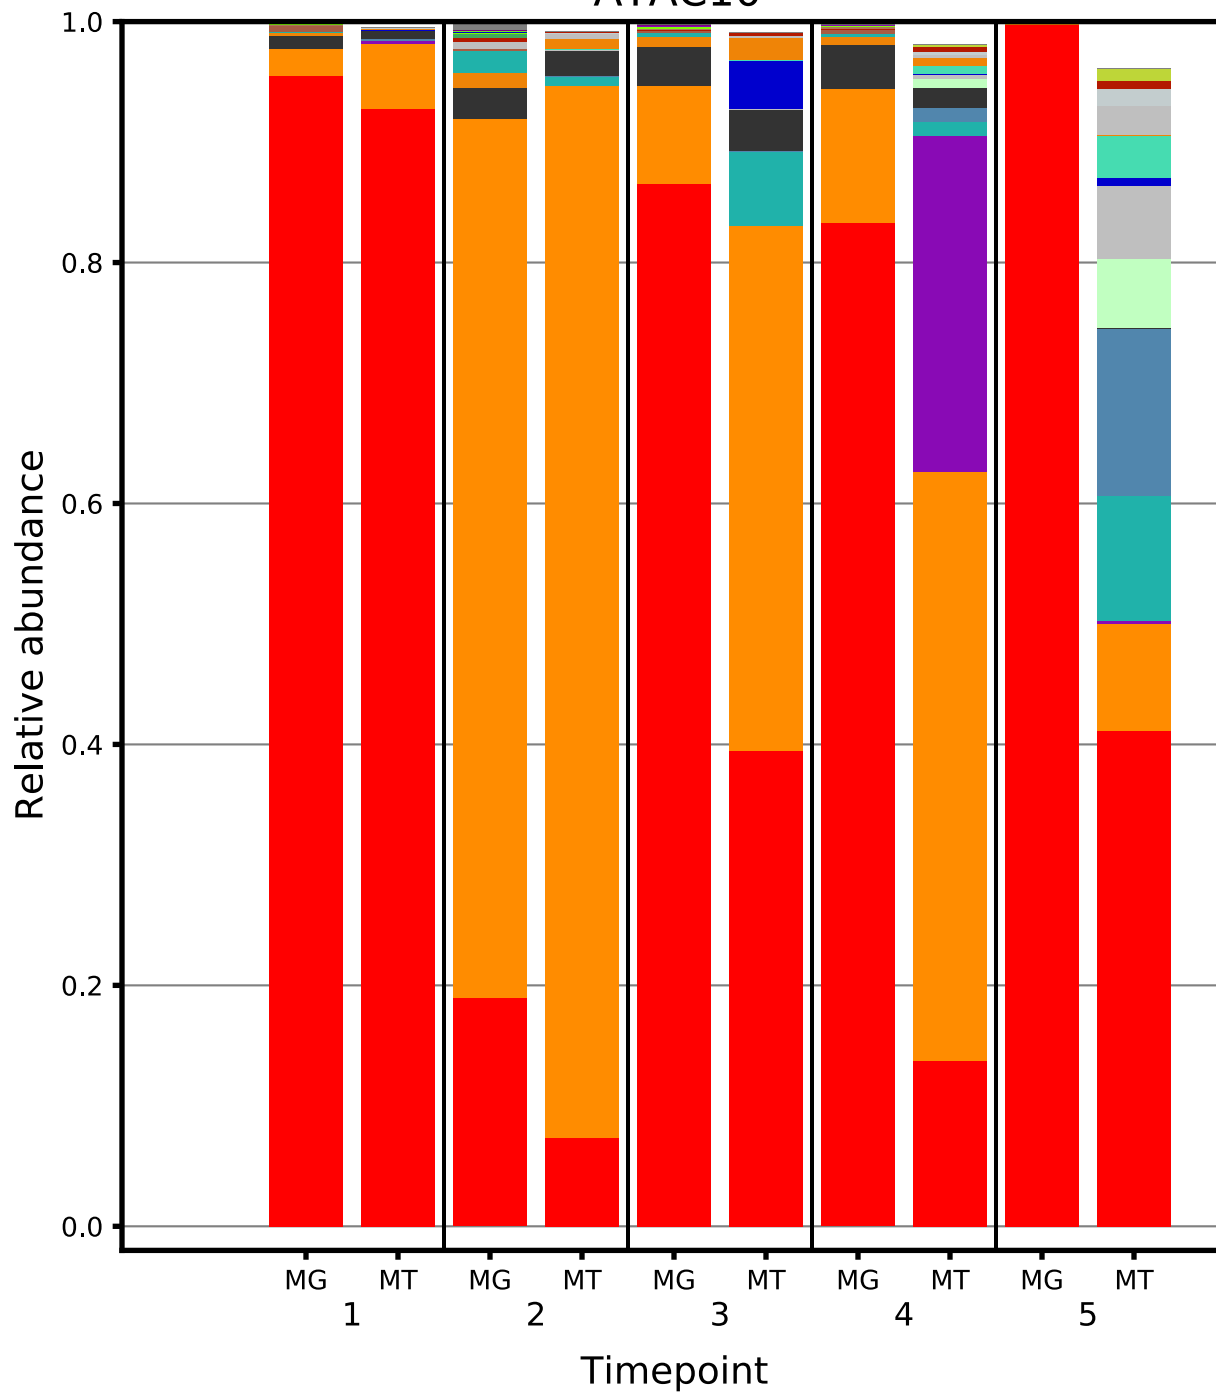

### Phylotype

- Lactobacillus\_jensenii*
- Prevotella\_bivia*
- Streptococcus\_anginosus*
- Lactobacillus\_iners*
- Peptoniphilus\_harei*
- Lactobacillus\_crispatus*
- Fingoldia\_magna*
- Prevotella\_amnii*
- Prevotella\_timonensis*
- Gardnerella\_vaginalis*
- Streptococcus\_agalactiae*
- Sneathia\_amnii*
- Prevotella\_corporis*
- Streptococcus\_urinalis*
- Bifidobacterium\_breve*
- Sneathia\_sanguinegens*
- Prevotella\_buccalis*
- Prevotella\_disiens*
- Atopobium\_vaginae*
- Anaerococcus\_hydrogenalis*
- Veillonella\_parvula*
- Propionibacterium\_sp.*
- Mageeibacillus\_indolicus*
- other

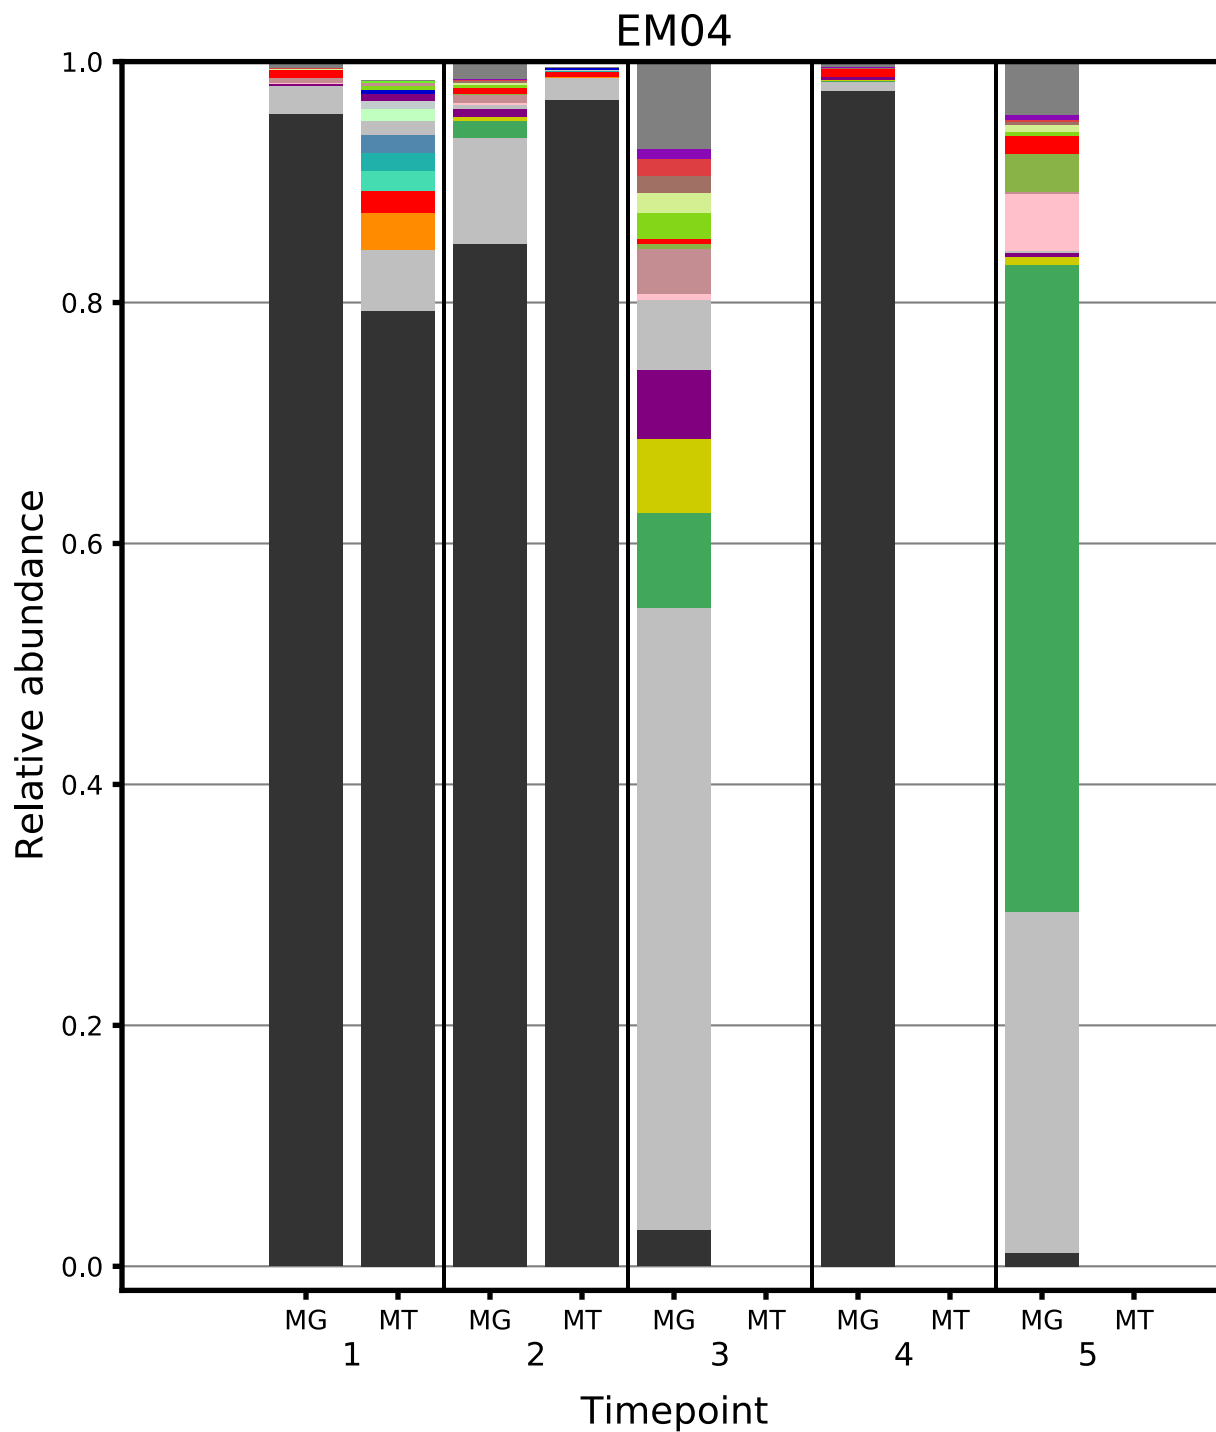

Phylotype

- Lactobacillus\_crispatus
- BVAB1
- Sneathia\_amnii
- Prevotella\_amnii
- Gardnerella\_vaginalis
- Prevotella\_bivia
- Lactobacillus\_iners
- Lactobacillus\_kefiranofaciens
- Bifidobacterium\_breve
- Lactobacillus\_gasseri
- Peptostreptococcus\_anaerobius
- Prevotella\_timonensis
- Lactobacillus\_jensenii
- Atopobium\_vaginae
- Sneathia\_sanguinegens
- Mageeibacillus\_indolicus
- Streptococcus\_anginosus
- Megaspheara\_genomosp.
- other

EM09

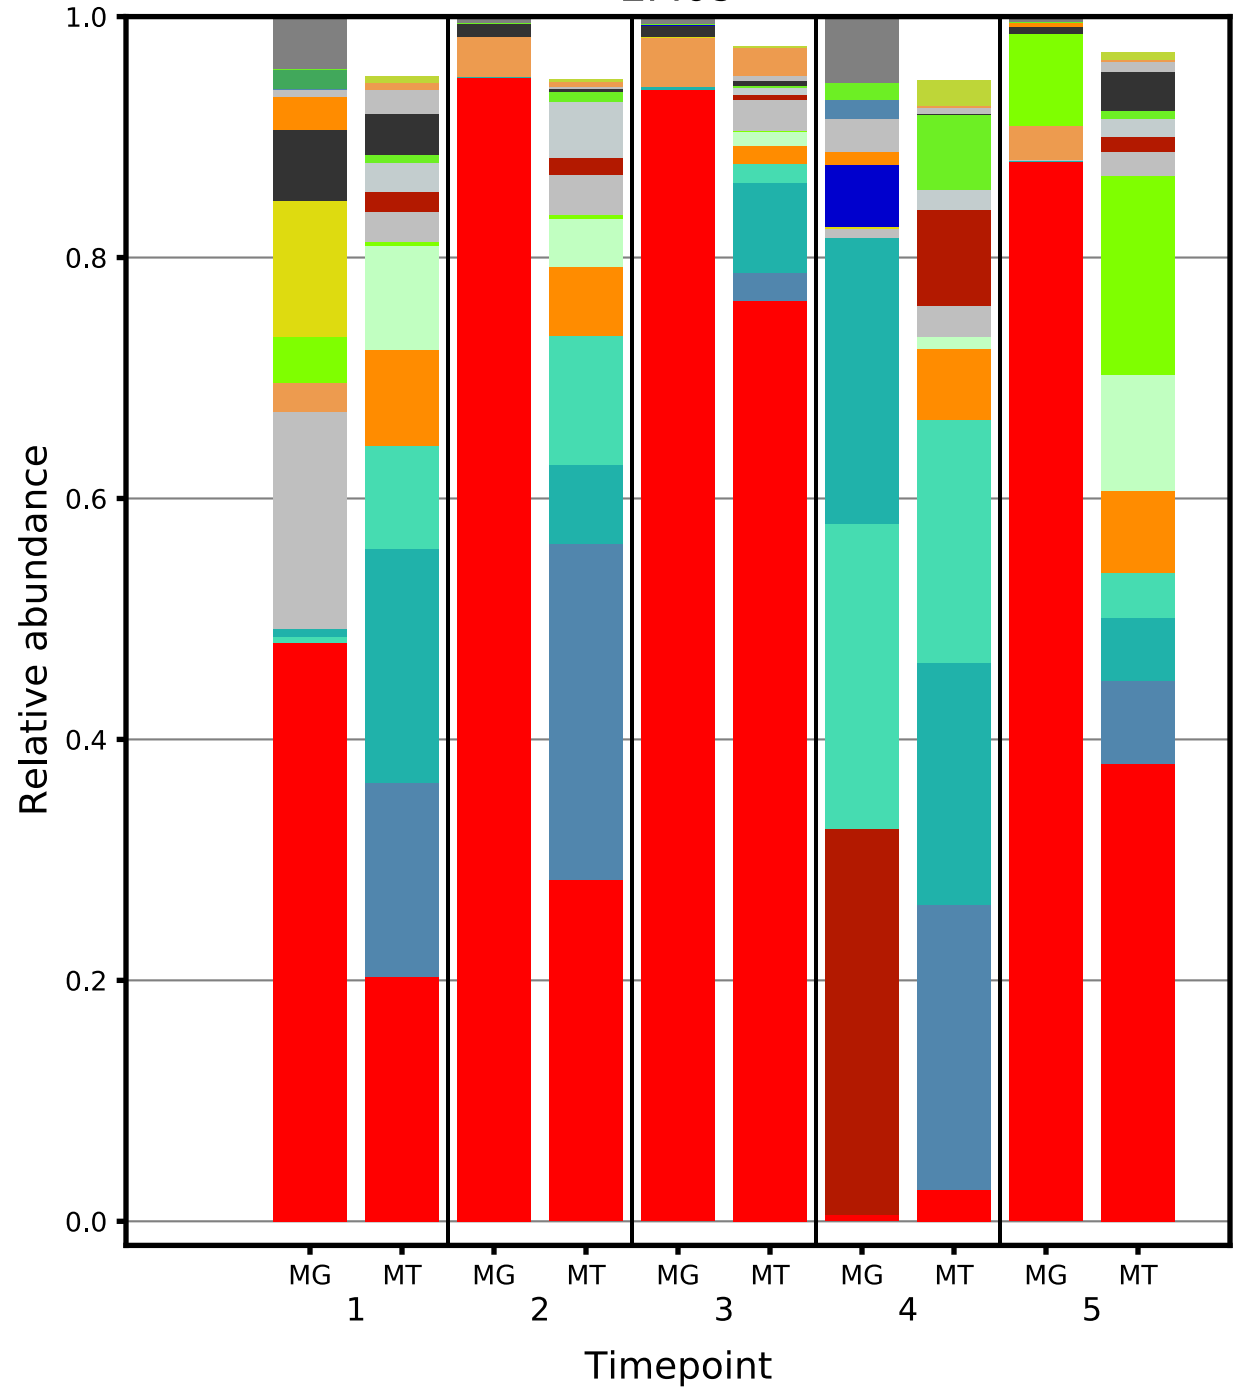



### Phylotype

- Lactobacillus\_iners
- Streptococcus\_agalactiae
- Lactobacillus\_crispatus
- Gardnerella\_vaginalis
- Finegoldia\_magna
- Escherichia\_coli
- BVAB1
- Prevotella\_bivia
- Lactobacillus\_gasseri
- Staphylococcus\_aureus
- Lactobacillus\_jensenii
- Sneathia\_amnii
- Prevotella\_timonensis
- Bifidobacterium\_breve
- Peptoniphilus\_harei
- Propionibacterium\_sp.
- Enterococcus\_faecalis
- Atopobium\_vaginae
- Prevotella\_amnii
- other

### EM10

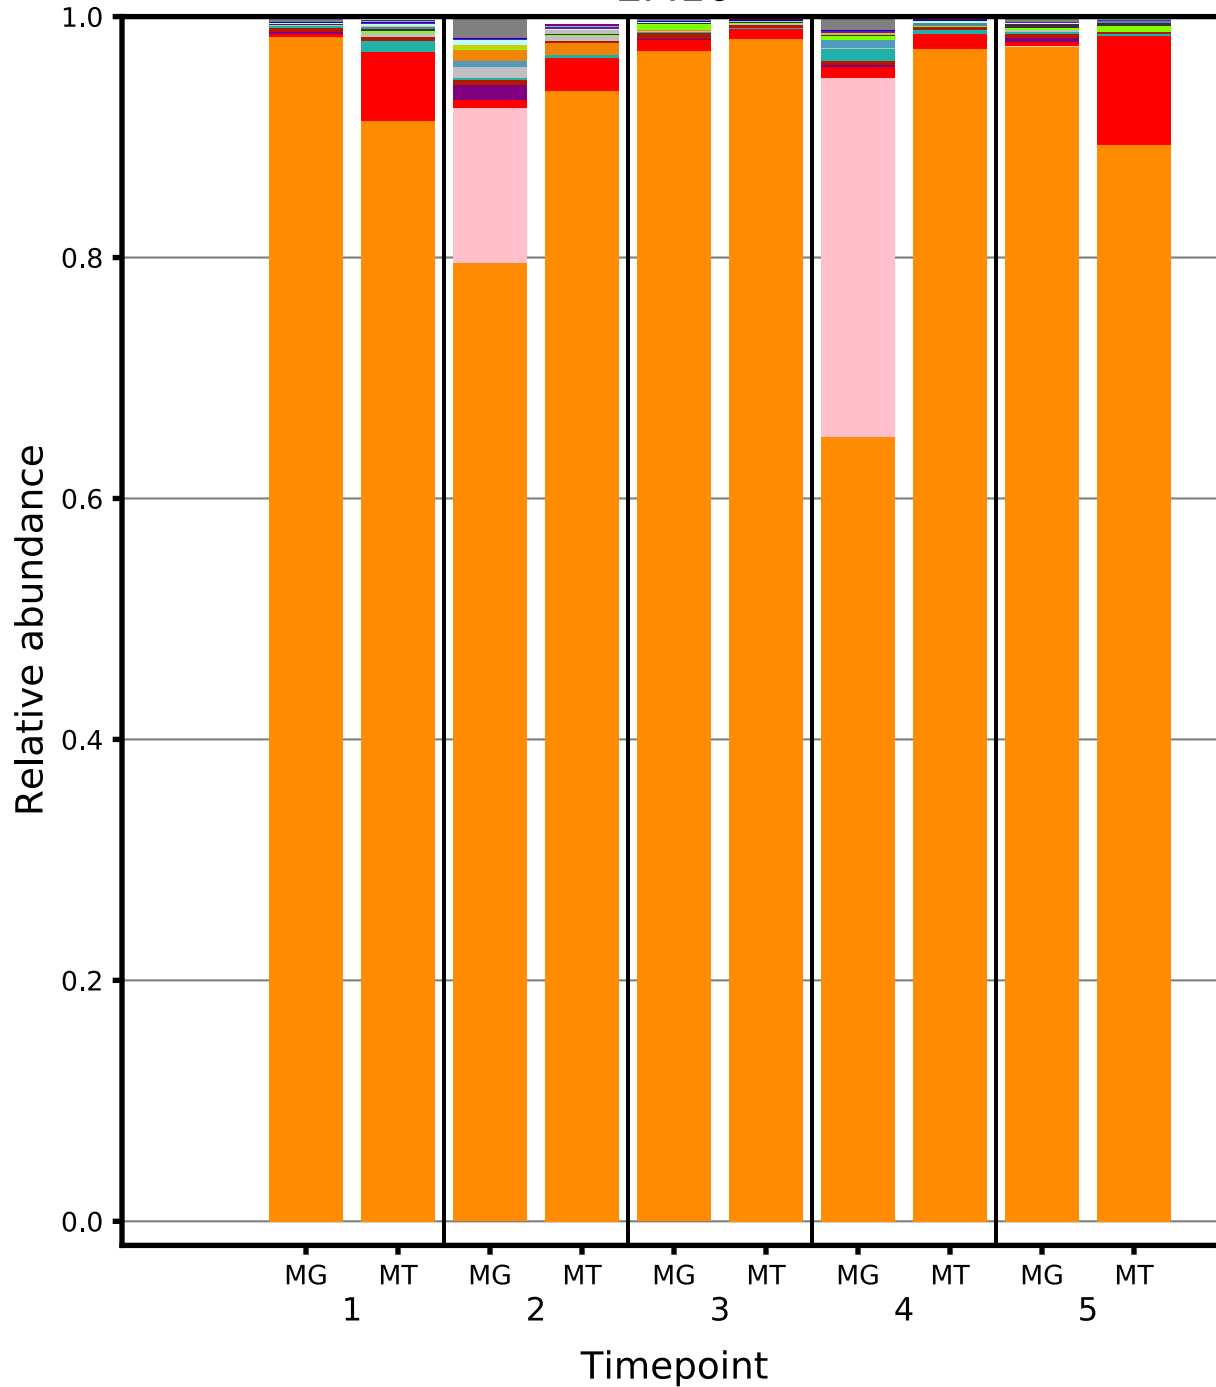

### Phylotype

- Lactobacillus\_crispatus
- Lactobacillus\_kefiranofaciens
- Lactobacillus\_iners
- Lactobacillus\_johnsonii
- Bifidobacterium\_breve
- Gardnerella\_vaginalis
- Lactobacillus\_gasseri
- Lactobacillus\_vaginalis
- Lactobacillus\_jensenii
- Corynebacterium\_amycolatum
- Enterococcus\_faecalis
- Lactobacillus\_ultunensis
- Finegoldia\_magna
- Mageeibacillus\_indolicus
- Sneathia\_sanguinegens
- Lactobacillus\_helveticus
- BVAB1
- Staphylococcus\_haemolyticus
- Prevotella\_amnii
- Corynebacterium\_pseudogenitalium
- Prevotella\_bivia
- other

### EM11

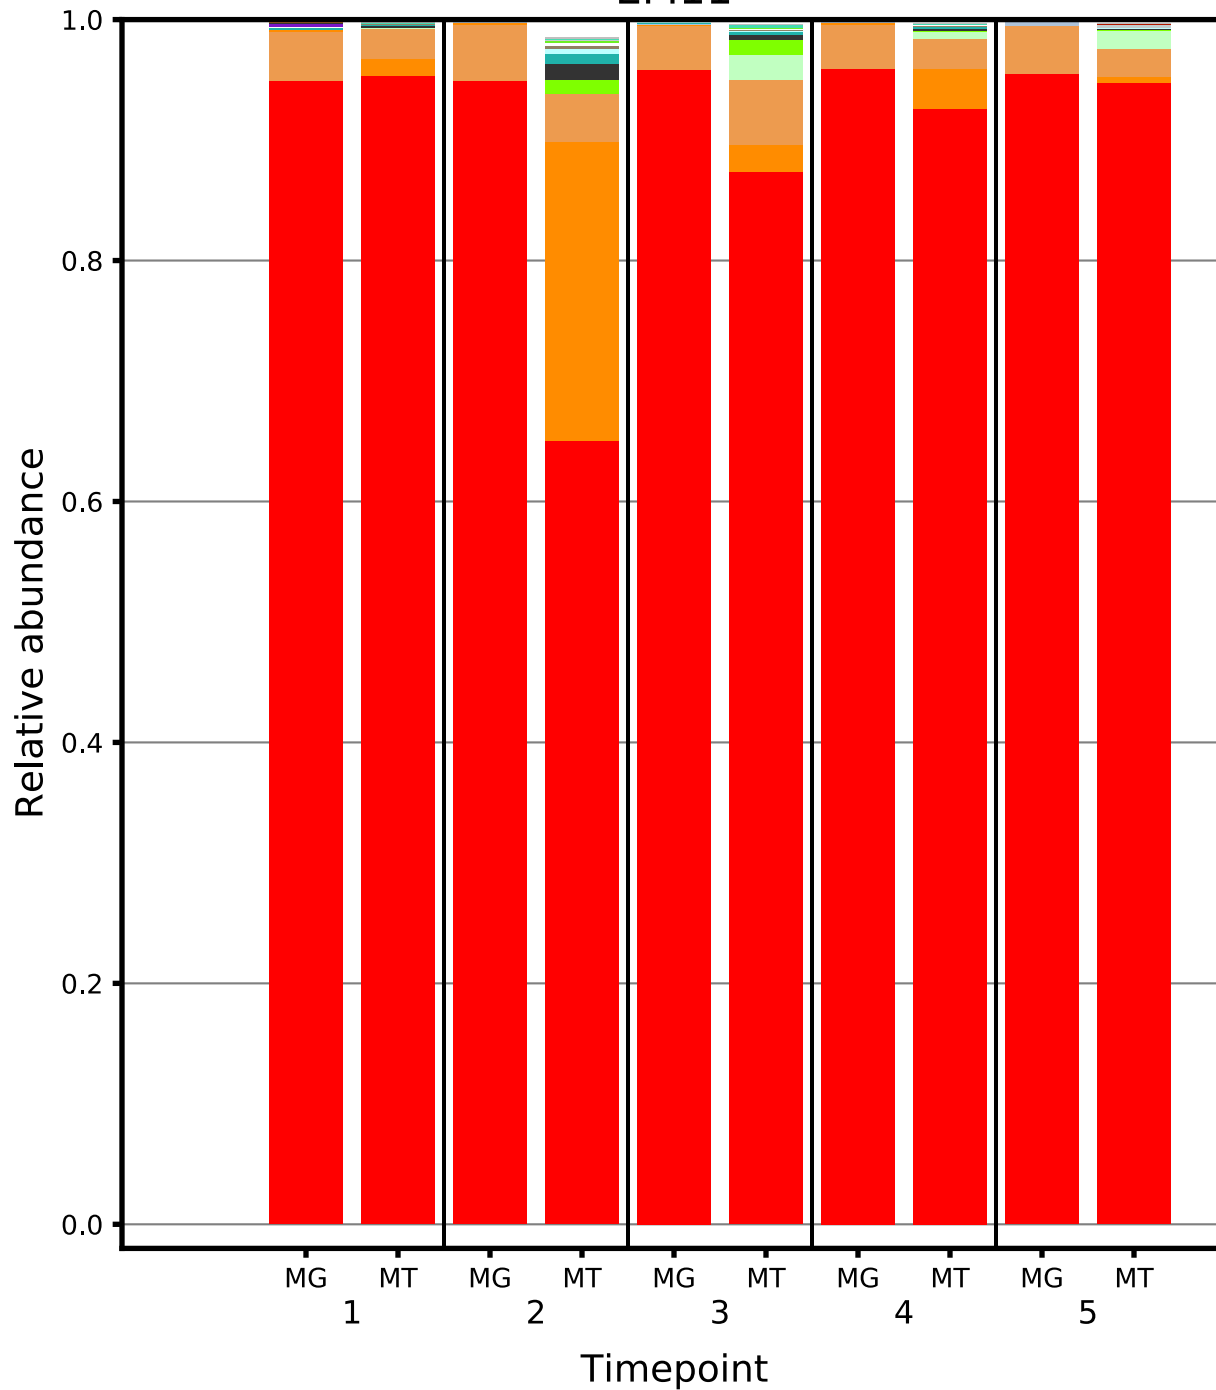





### Phylotype

- Lactobacillus\_iners*
- Lactobacillus\_jensenii*
- Lactobacillus\_crispatus*
- Prevotella\_bivia*
- Staphylococcus\_epidermidis*
- Corynebacterium\_pseudogenitalium*
- Gemella\_haemolysans*
- Finegoldia\_magna*
- Ureaplasma\_urealyticum*
- Enterococcus\_faecalis*
- Streptococcus\_mitis*
- Streptococcus\_anginosus*
- Propionibacterium\_sp.*
- Sneathia\_amnii*
- Gardnerella\_vaginalis*
- BVAB1*
- Haemophilus\_parainfluenzae*
- Corynebacterium\_glucuronolyticum*
- Prevotella\_timonensis*
- Bifidobacterium\_breve*
- Peptoniphilus\_lacrimalis*
- Veillonella\_atypica*
- other

### UAB007

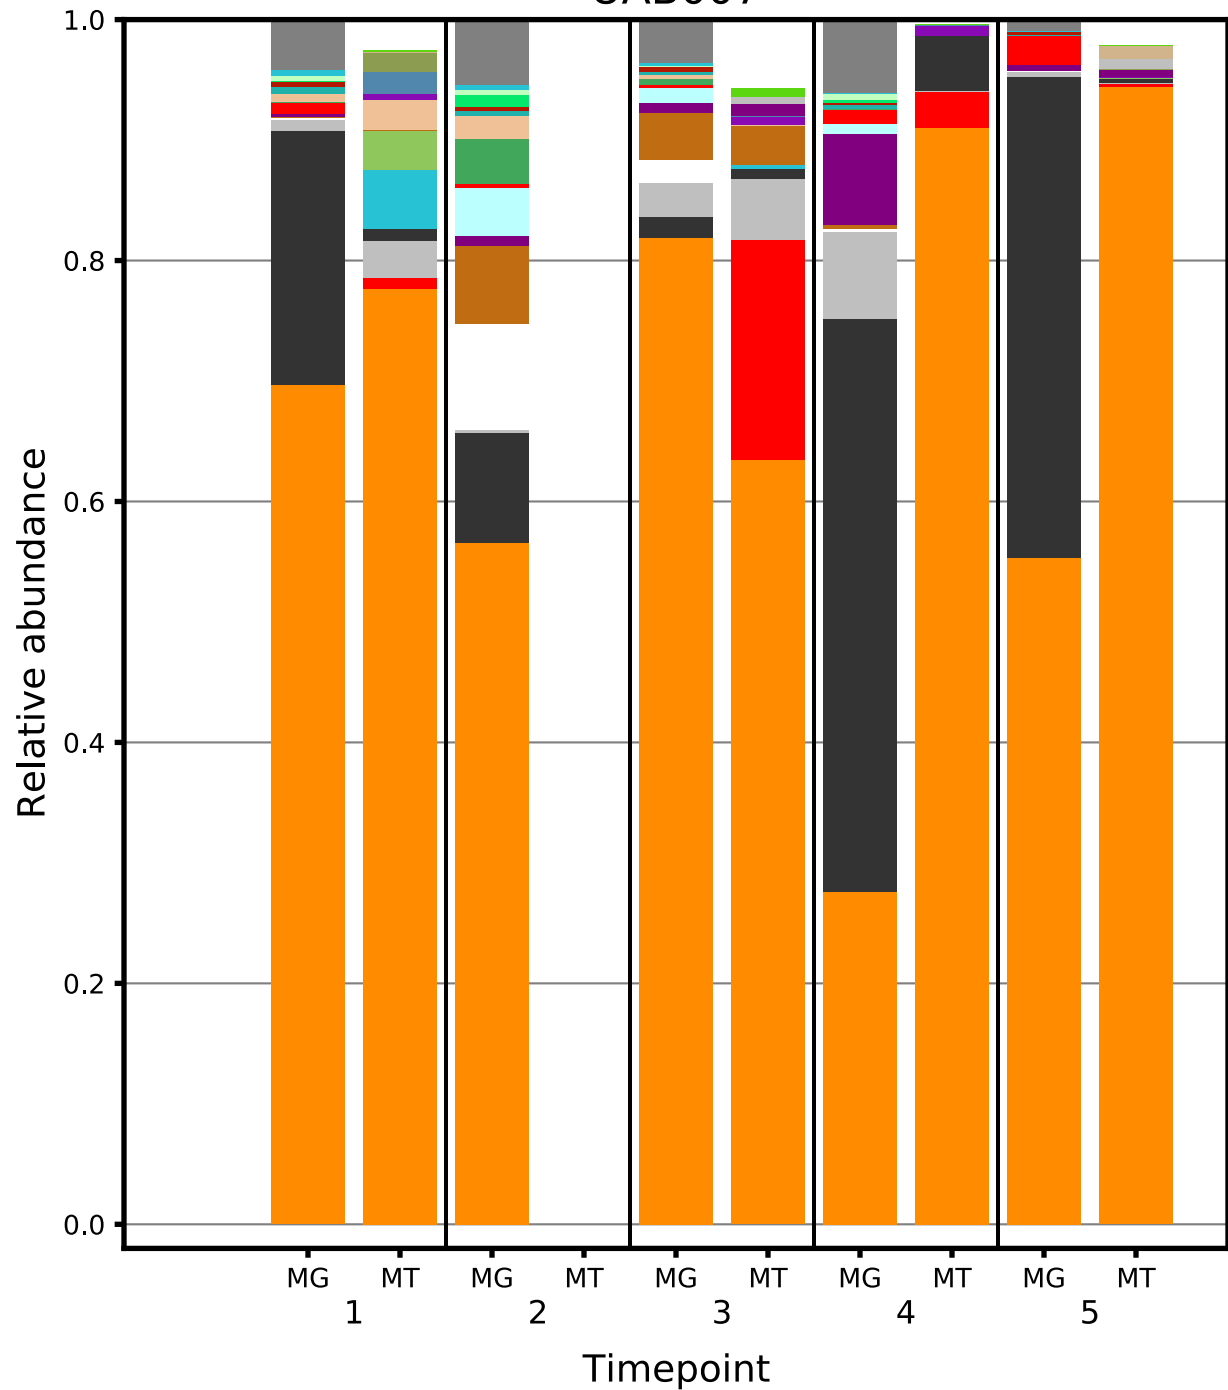

Phylotype

- Lactobacillus\_crispatus
- Lactobacillus\_iners
- Prevotella\_disiens
- Lactobacillus\_jensenii
- Anaerococcus\_tetradius
- Lactobacillus\_gasseri
- Actinomyces\_turicensis
- Prevotella\_timonensis
- Prevotella\_bivia
- Lactobacillus\_ultunensis
- Streptococcus\_anginosus
- Anaerococcus\_lactolyticus
- Gardnerella\_vaginalis
- Enterococcus\_faecalis
- Finegoldia\_magna
- Treponema\_phagedenis
- Roseomonas\_cervicalis
- Peptostreptococcus\_anaerobius
- Atopobium\_vaginae
- Prevotella\_buccalis
- Peptoniphilus\_harei
- other

UAB010

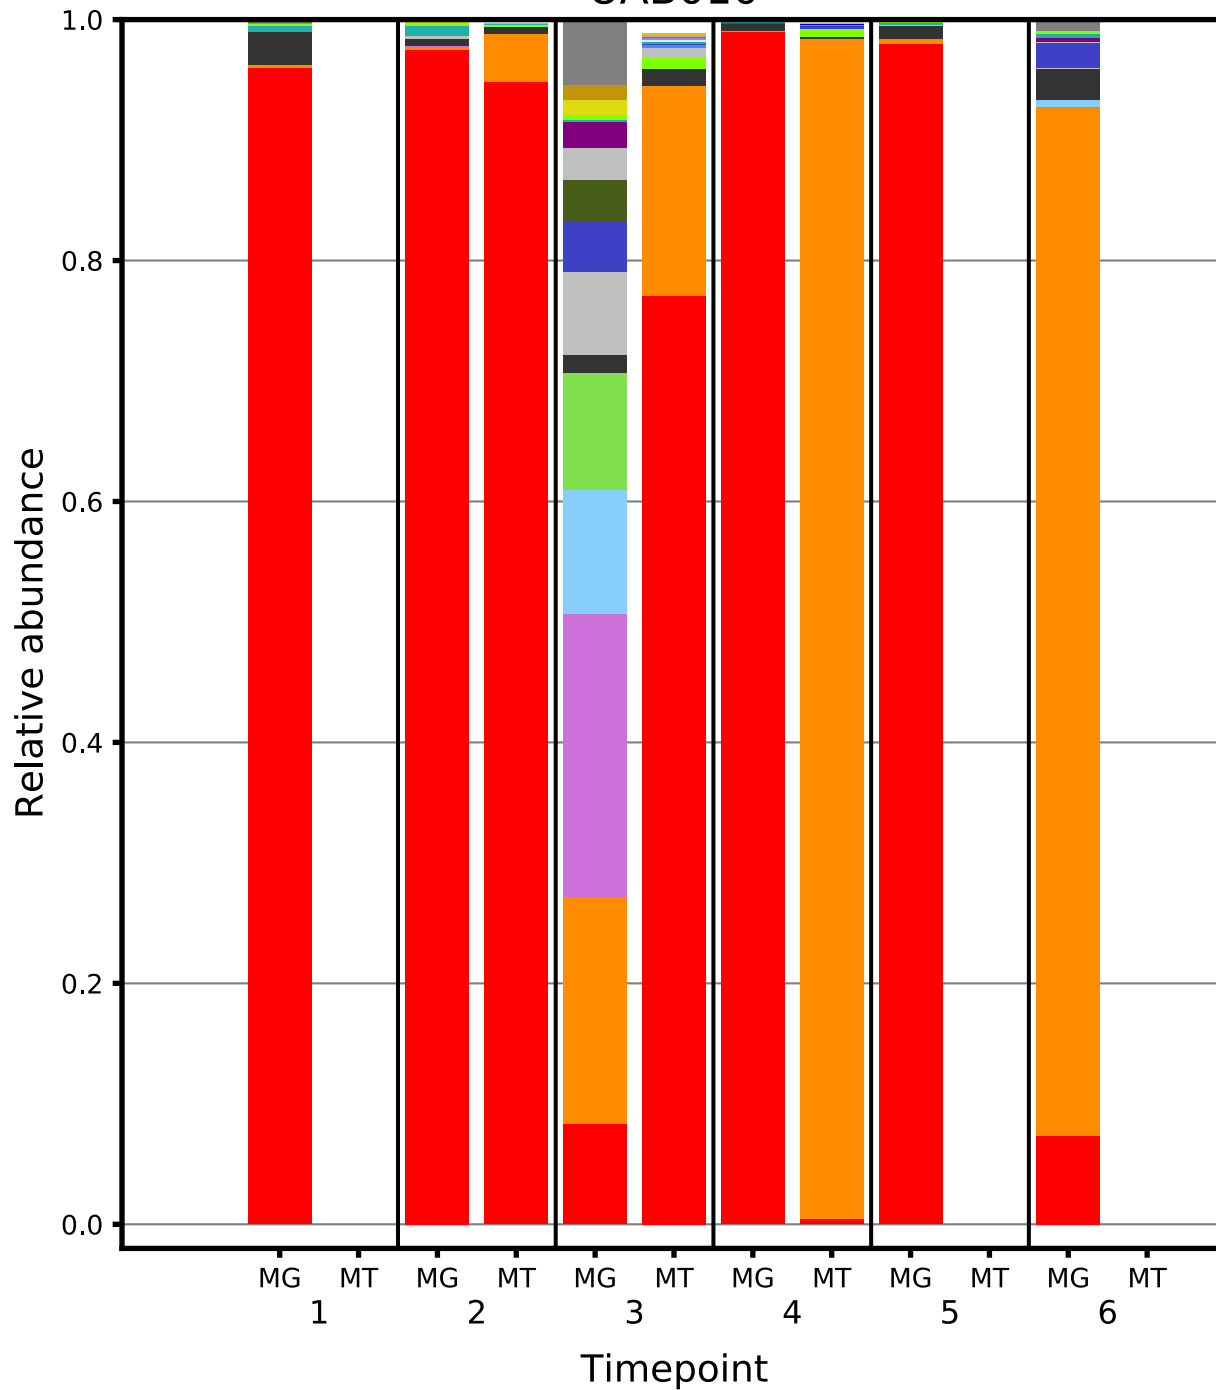

Phylotype

- Lactobacillus\_gasseri
- Lactobacillus\_jensenii
- Prevotella\_timonensis
- Anaerococcus\_lactolyticus
- Propionimicrobium\_lymphophilum
- Prevotella\_corporis
- Peptoniphilus\_harei
- Clostridiales\_Family
- Prevotella\_buccalis
- Lactobacillus\_iners
- Finegoldia\_magna
- Prevotella\_disiens
- Lactobacillus\_johnsonii
- Prevotella\_bergensis
- Peptoniphilus\_duerdenii
- Gardnerella\_vaginalis
- Prevotella\_multiformis
- Mobiluncus\_mulieris
- other

UAB011

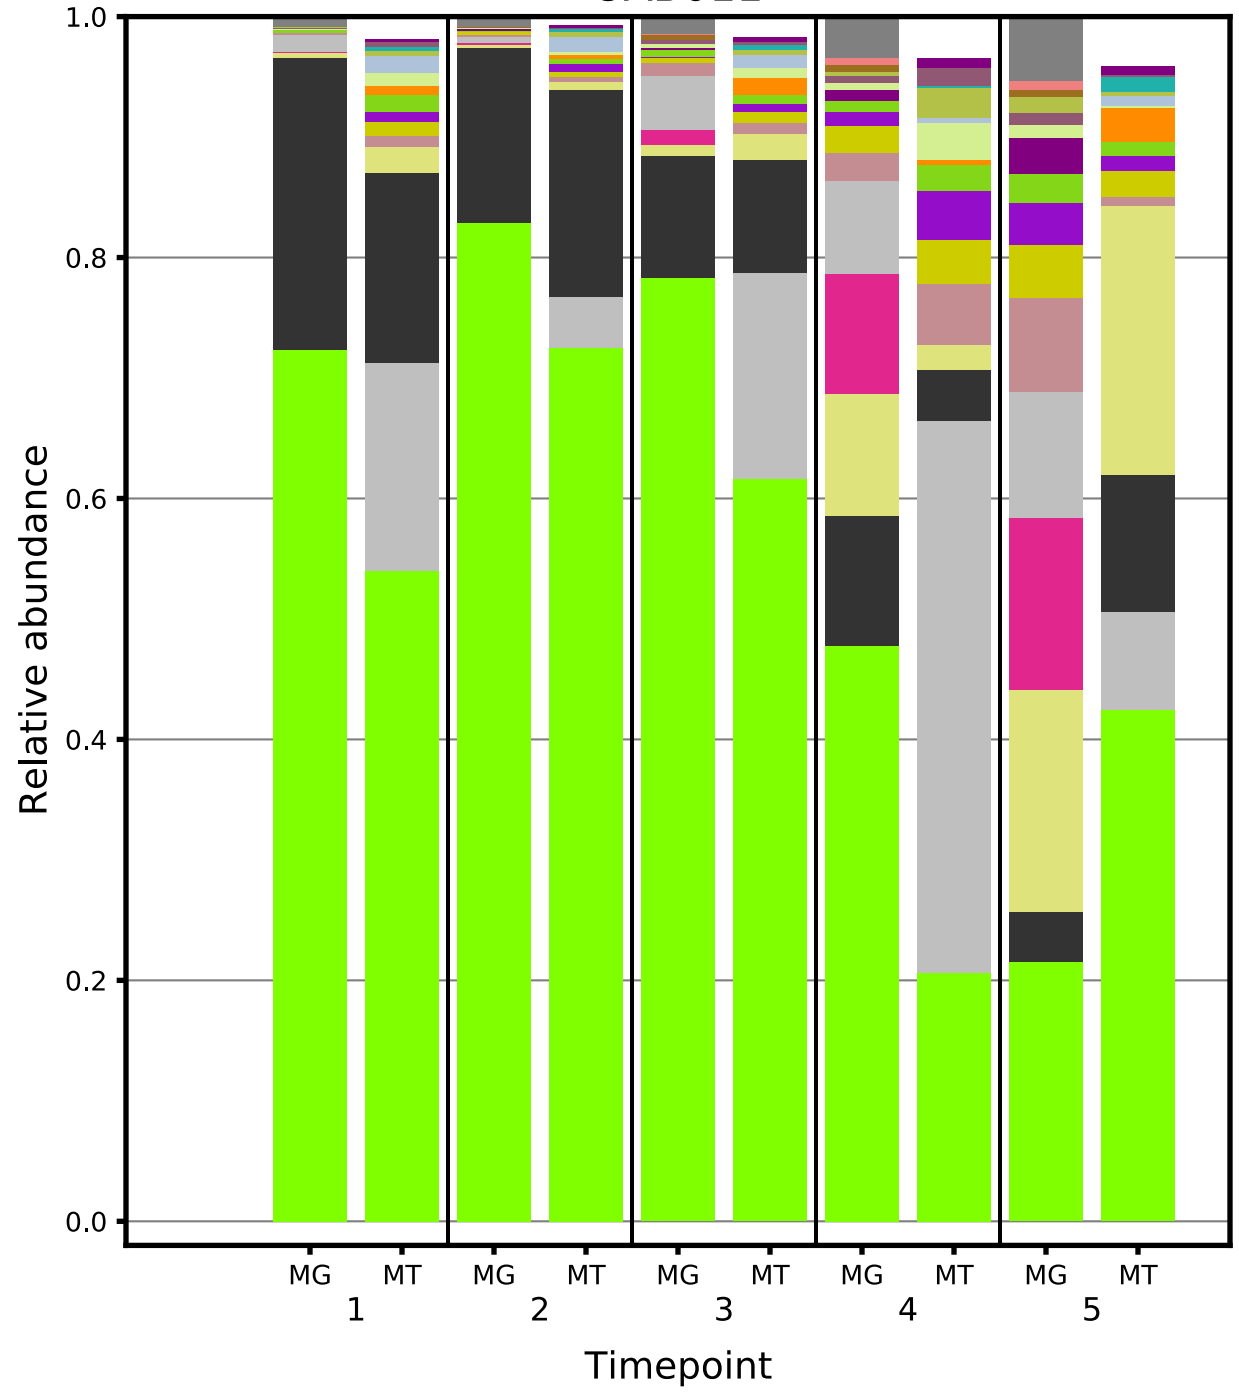









### Phylotype

- Gardnerella\_vaginalis
- Lactobacillus\_crispatus
- Lactobacillus\_jensenii
- Lactobacillus\_gasseri
- Prevotella\_bivia
- Lactobacillus\_iners
- Actinomyces\_neuii
- Prevotella\_timonensis
- Atopobium\_vaginae
- Sneathia\_amnii
- Prevotella\_amnii
- Prevotella\_corporis
- Prevotella\_buccalis
- Finegoldia\_magna
- BVAB1
- Lactobacillus\_coleohominis
- Sneathia\_sanguinegens
- Prevotella\_sp.
- Staphylococcus\_lugdunensis
- Lactobacillus\_johnsonii
- Porphyromonas\_uenonis
- other

### UAB028

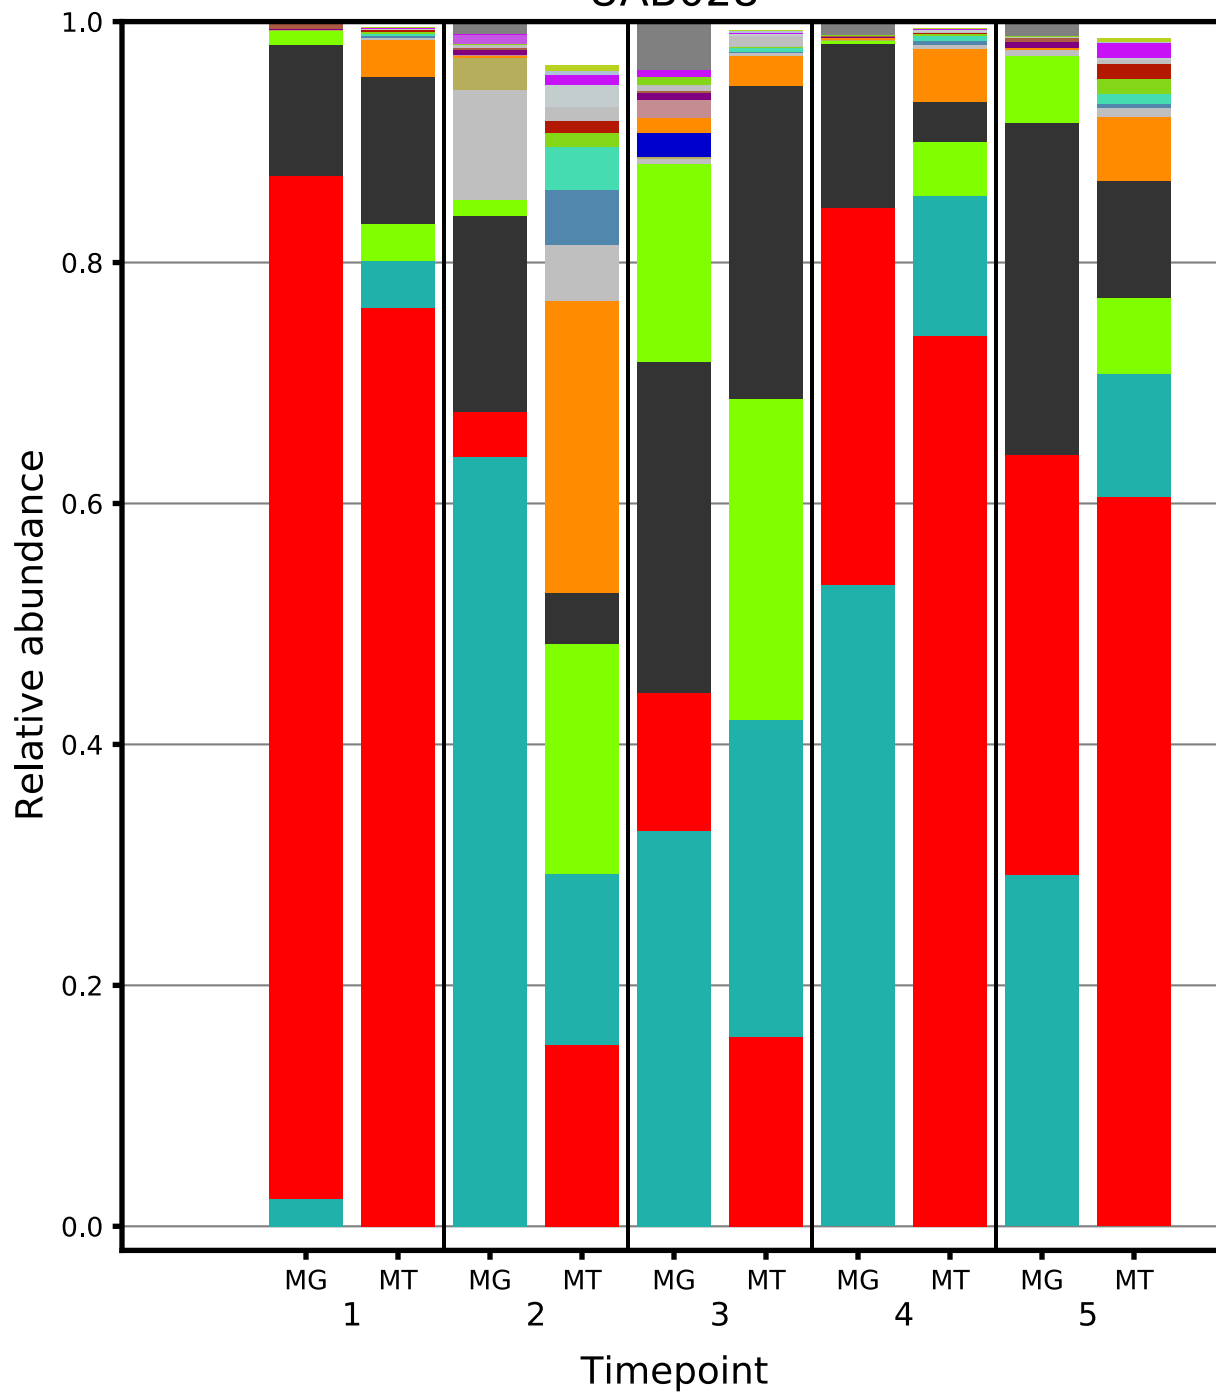





### Phylotype

- Gardnerella\_vaginalis
- Atopobium\_vaginae
- Lactobacillus\_iners
- BVAB1
- Lactobacillus\_gasseri
- Prevotella\_bivia
- Lactobacillus\_crispatus
- Propionibacterium\_sp.
- Lactobacillus\_salivarius
- Lactobacillus\_jensenii
- Prevotella\_amnii
- Peptoniphilus\_asaccharolyticus
- Prevotella\_timonensis
- Sneathia\_amnii
- Actinomyces\_graevenitzi
- Sneathia\_sanguinegens
- Streptococcus\_mitis
- Prevotella\_buccalis
- Mageeibacillus\_indolicus
- Prevotella\_sp.
- Lactobacillus\_johnsonii
- Gemella\_haemolysans
- other

### UAB039

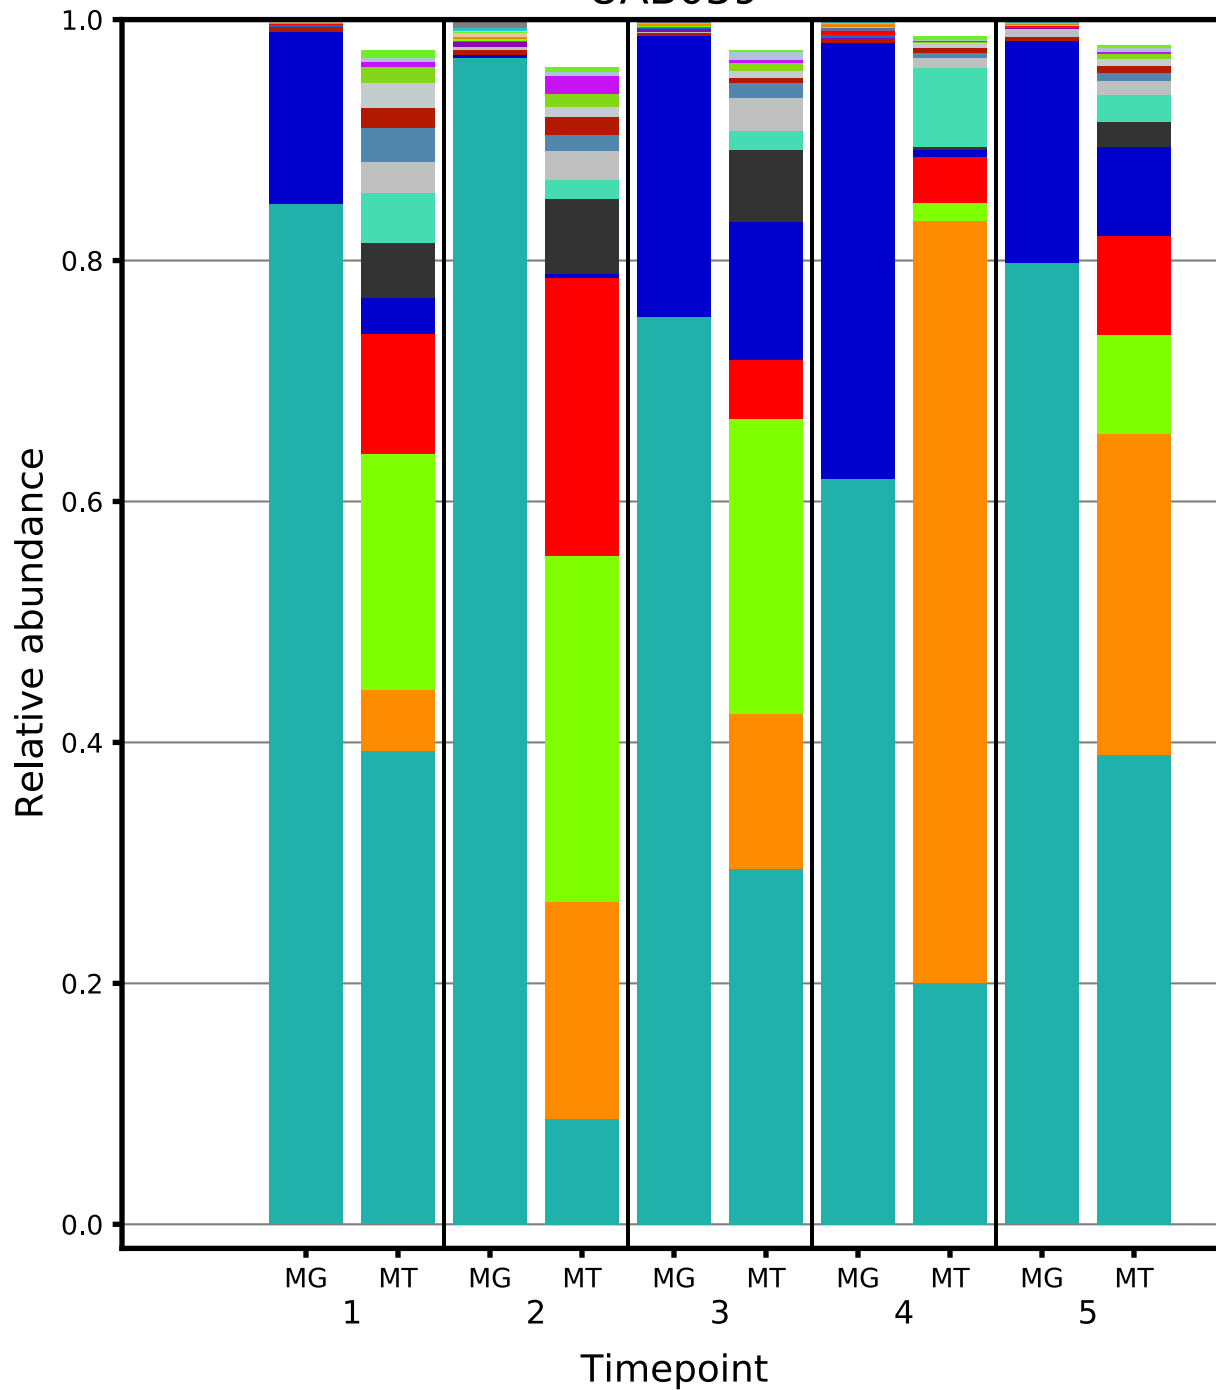





















Phylotype

- Lactobacillus\_crispatus
- Lactobacillus\_gasseri
- Gardnerella\_vaginalis
- Lactobacillus\_iners
- BVAB1
- Prevotella\_timonensis
- Lactobacillus\_johnsonii
- Sneathia\_amnii
- Lactobacillus\_jensenii
- Ureaplasma\_parvum
- Sneathia\_sanguinegens
- Lactobacillus\_ultunensis
- Prevotella\_buccalis
- Finegoldia\_magna
- Ureaplasma\_urealyticum
- Megaspheara\_genomosp.
- Lactobacillus\_helveticus
- Prevotella\_sp.
- Anaerococcus\_hydrogenalis
- Prevotella\_amnii
- Facklamia\_hominis
- Prevotella\_bivia
- Streptococcus\_anginosus
- Mageeibacillus\_indolicus
- other

UAB093

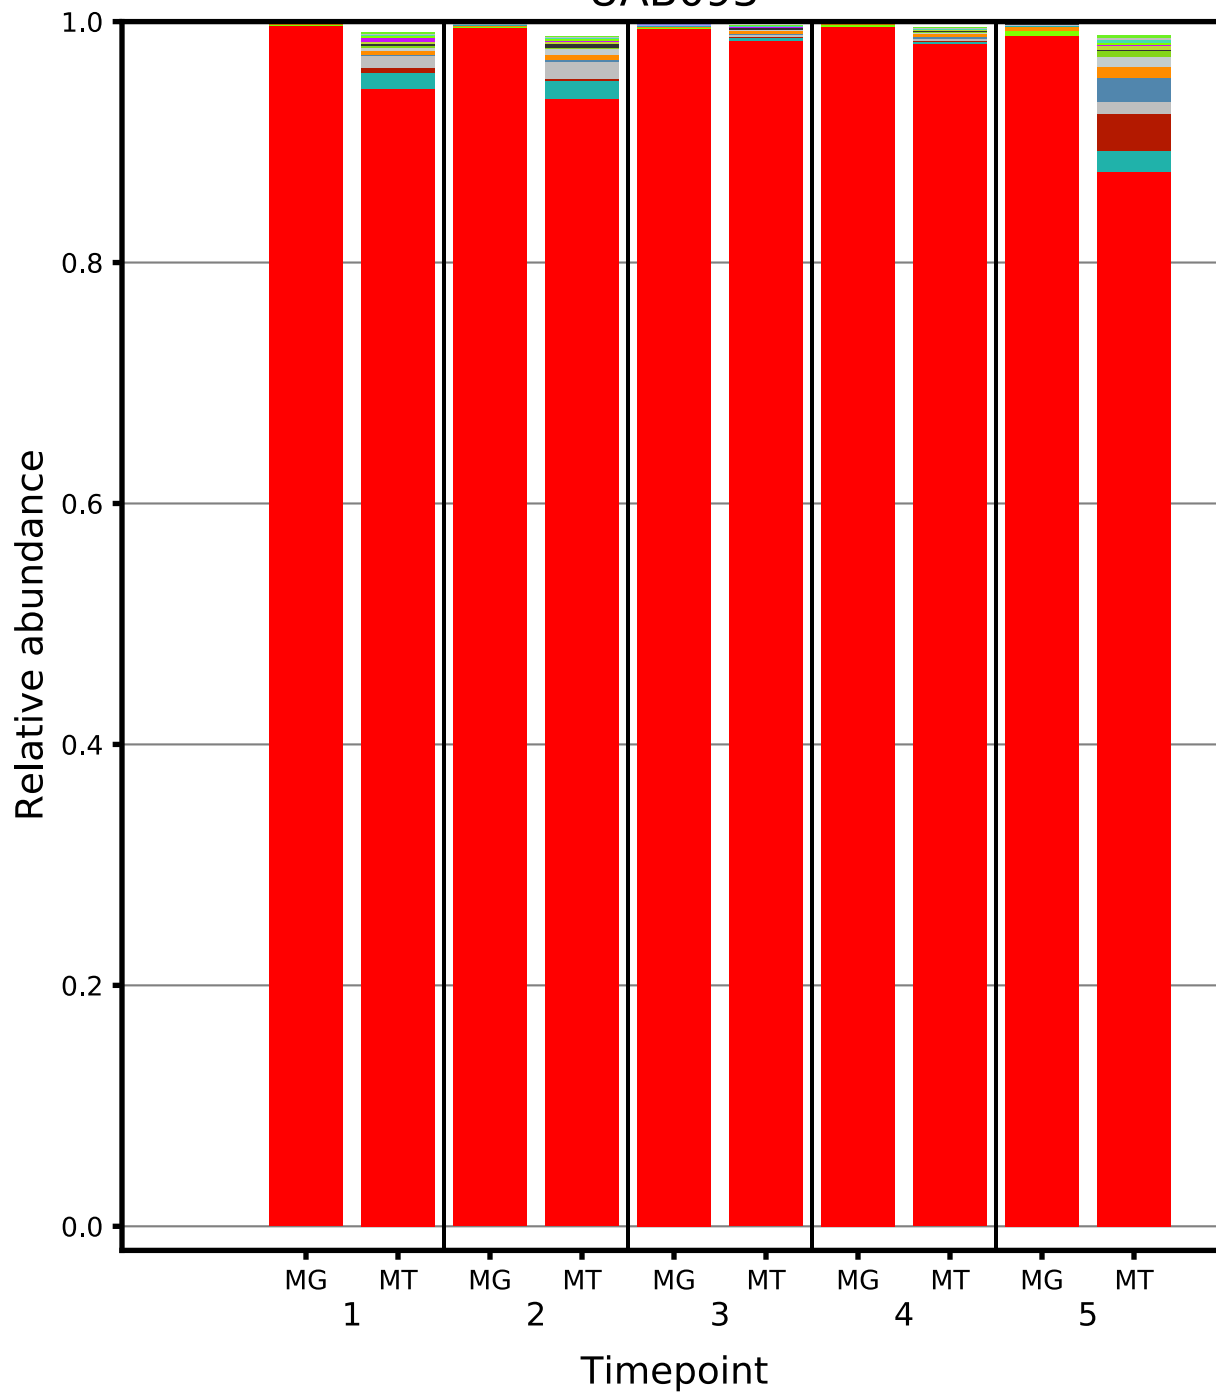



### Phylotype

- Streptococcus\_anginosus
- Prevotella\_bivia
- Staphylococcus\_lugdunensis
- BVAB1
- Lactobacillus\_iners
- Gardnerella\_vaginalis
- Lactobacillus\_crispatus
- Sneathia\_amnii
- Lactobacillus\_jensenii
- Prevotella\_timonensis
- Enterococcus\_faecalis
- Escherichia\_coli
- Bifidobacterium\_breve
- Bifidobacterium\_longum
- Sneathia\_sanguinegens
- Streptococcus\_agalactiae
- Gemella\_haemolysans
- Staphylococcus\_epidermidis
- Streptococcus\_urinalis
- Prevotella\_buccalis
- Actinomyces\_neuui
- Megaspheara\_genomosp.
- Bifidobacterium\_sp.
- Prevotella\_amnii
- other

### UAB096

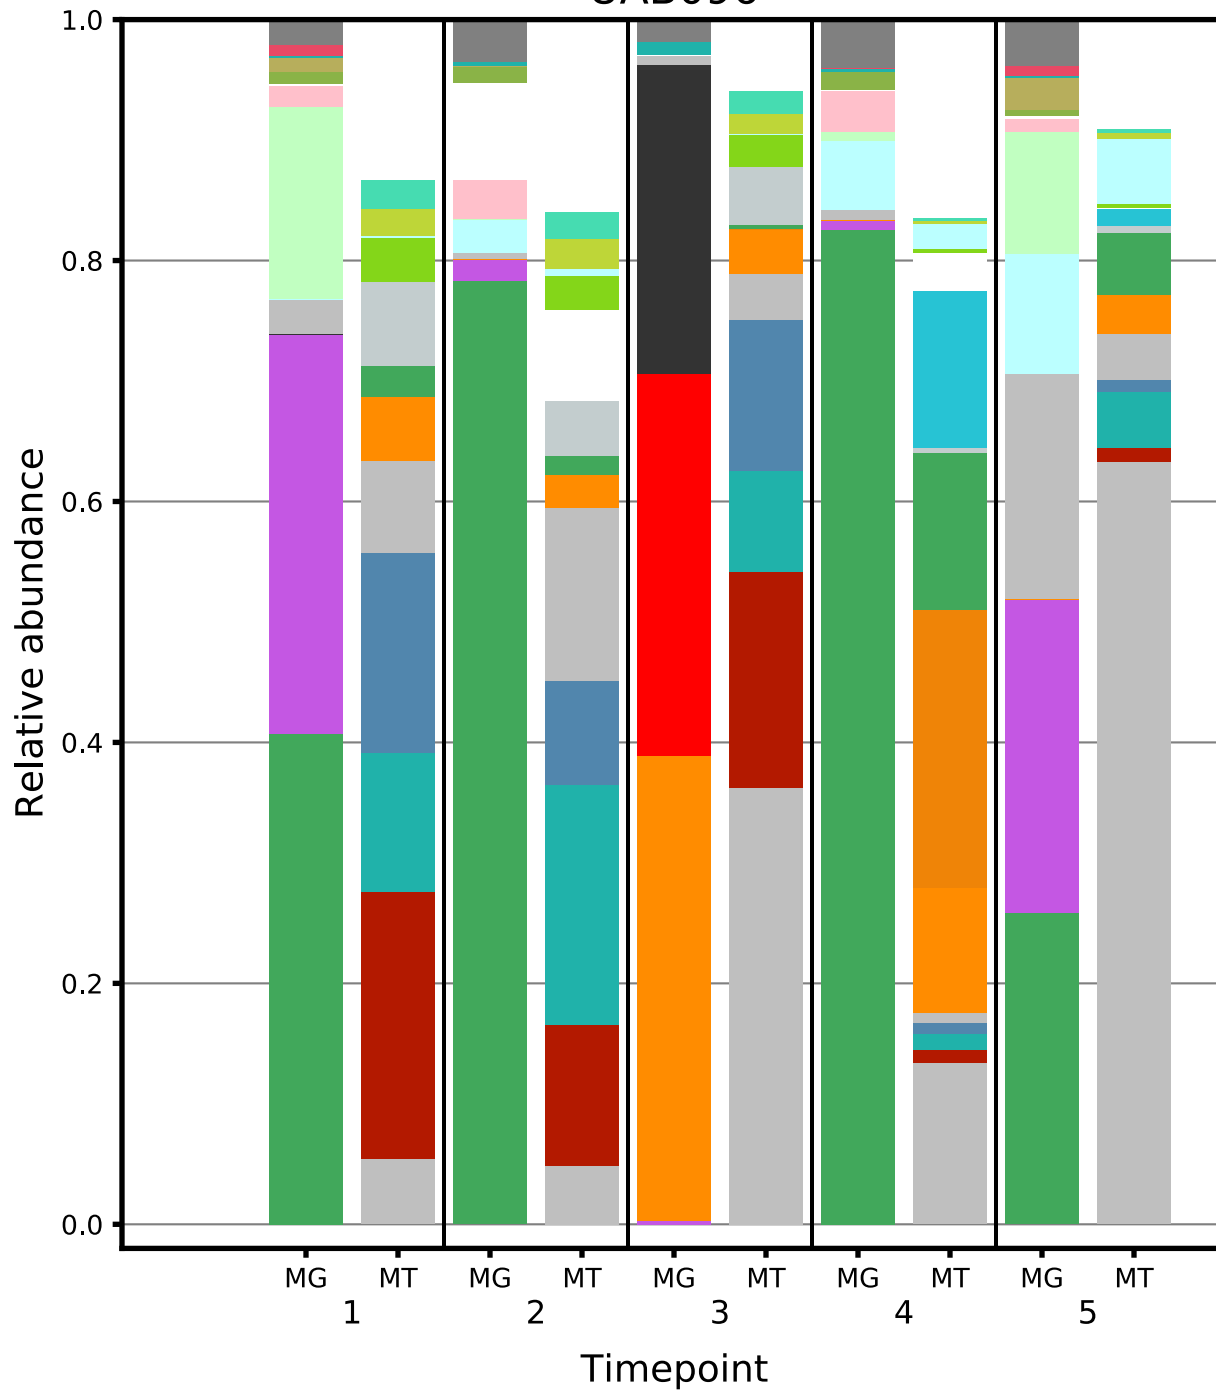

Phylotype

- Lactobacillus\_jensenii
- Lactobacillus\_iners
- Finegoldia\_magna
- Gardnerella\_vaginalis
- Prevotella\_bivia
- Prevotella\_timonensis
- Lactobacillus\_crispatus
- Peptoniphilus\_harei
- BVAB1
- Sneathia\_amnii
- Streptococcus\_anginosus
- Sneathia\_sanguinegens
- Anaerococcus\_tetradius
- Anaerococcus\_hydrogenalis
- Prevotella\_buccalis
- Megaspheara\_genomosp.
- Actinomyces\_neuui
- Peptostreptococcus\_anaerobius
- Prevotella\_amnii
- Corynebacterium\_amycolatum
- other

UAB106

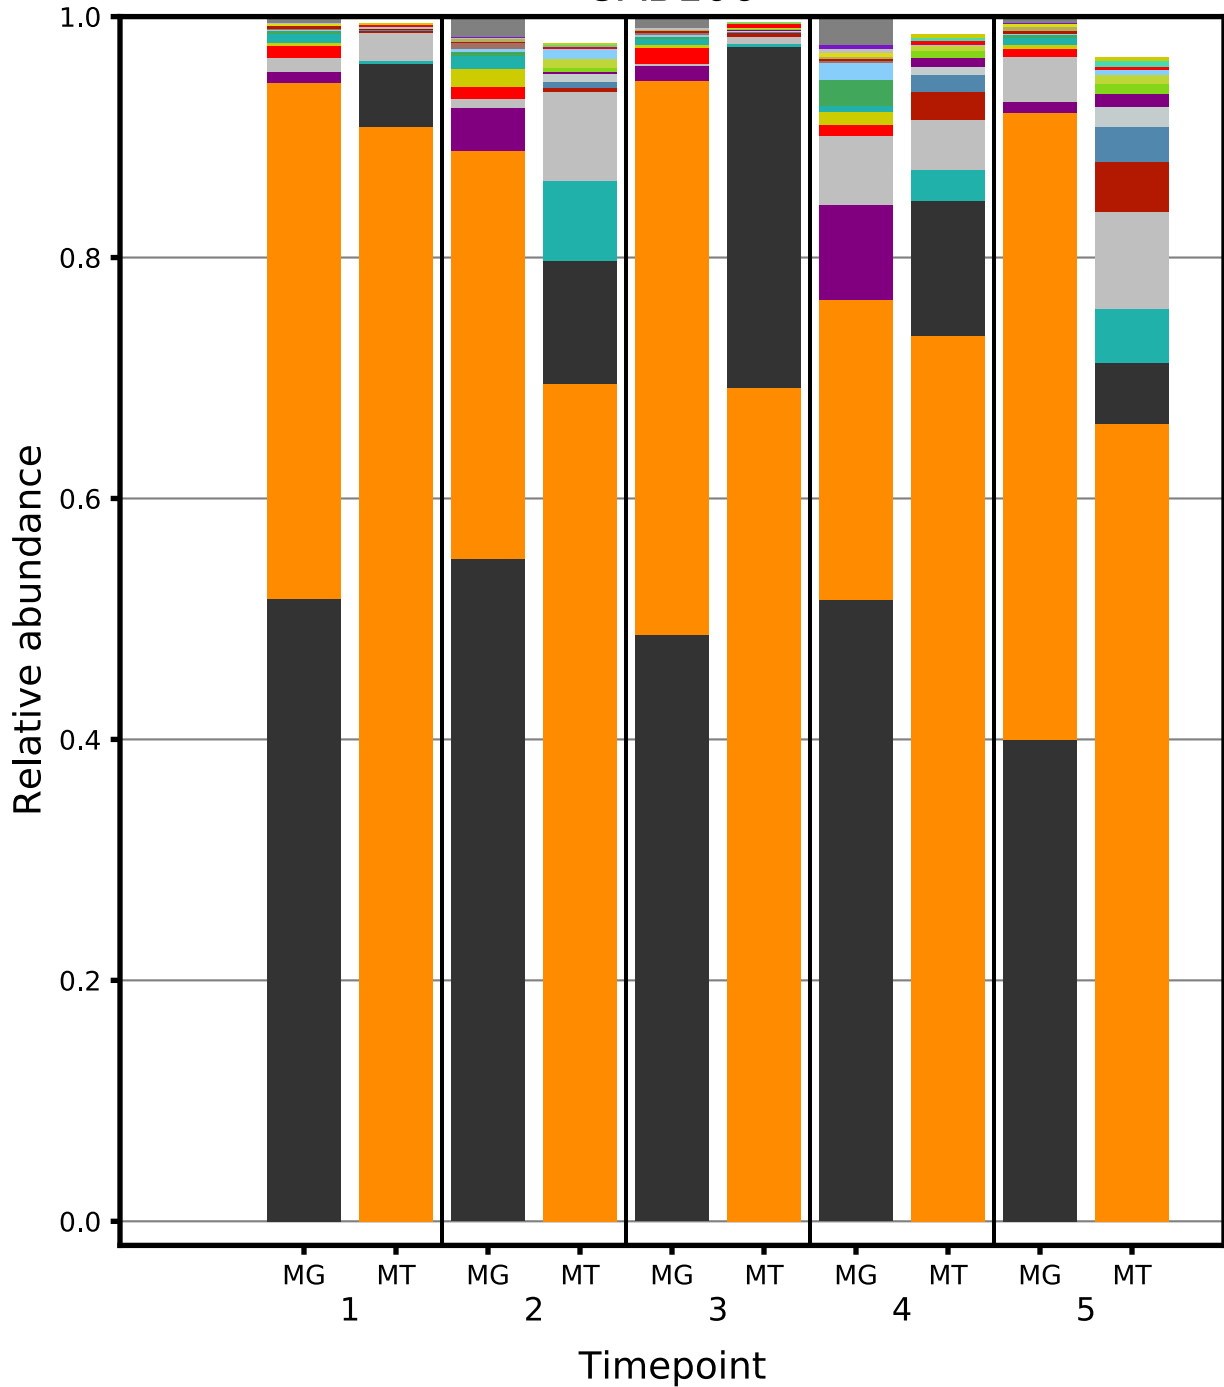

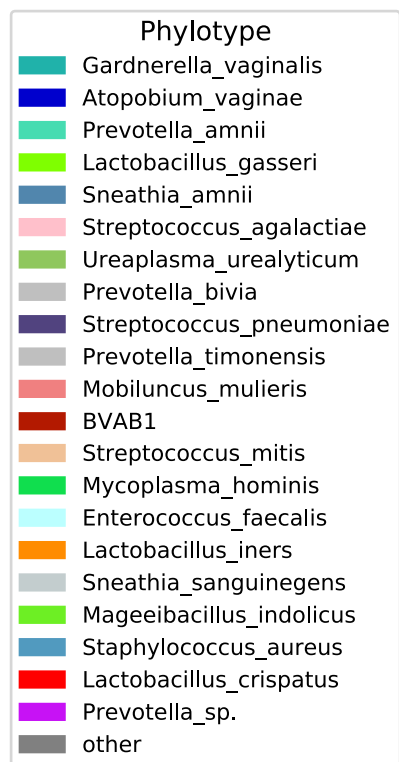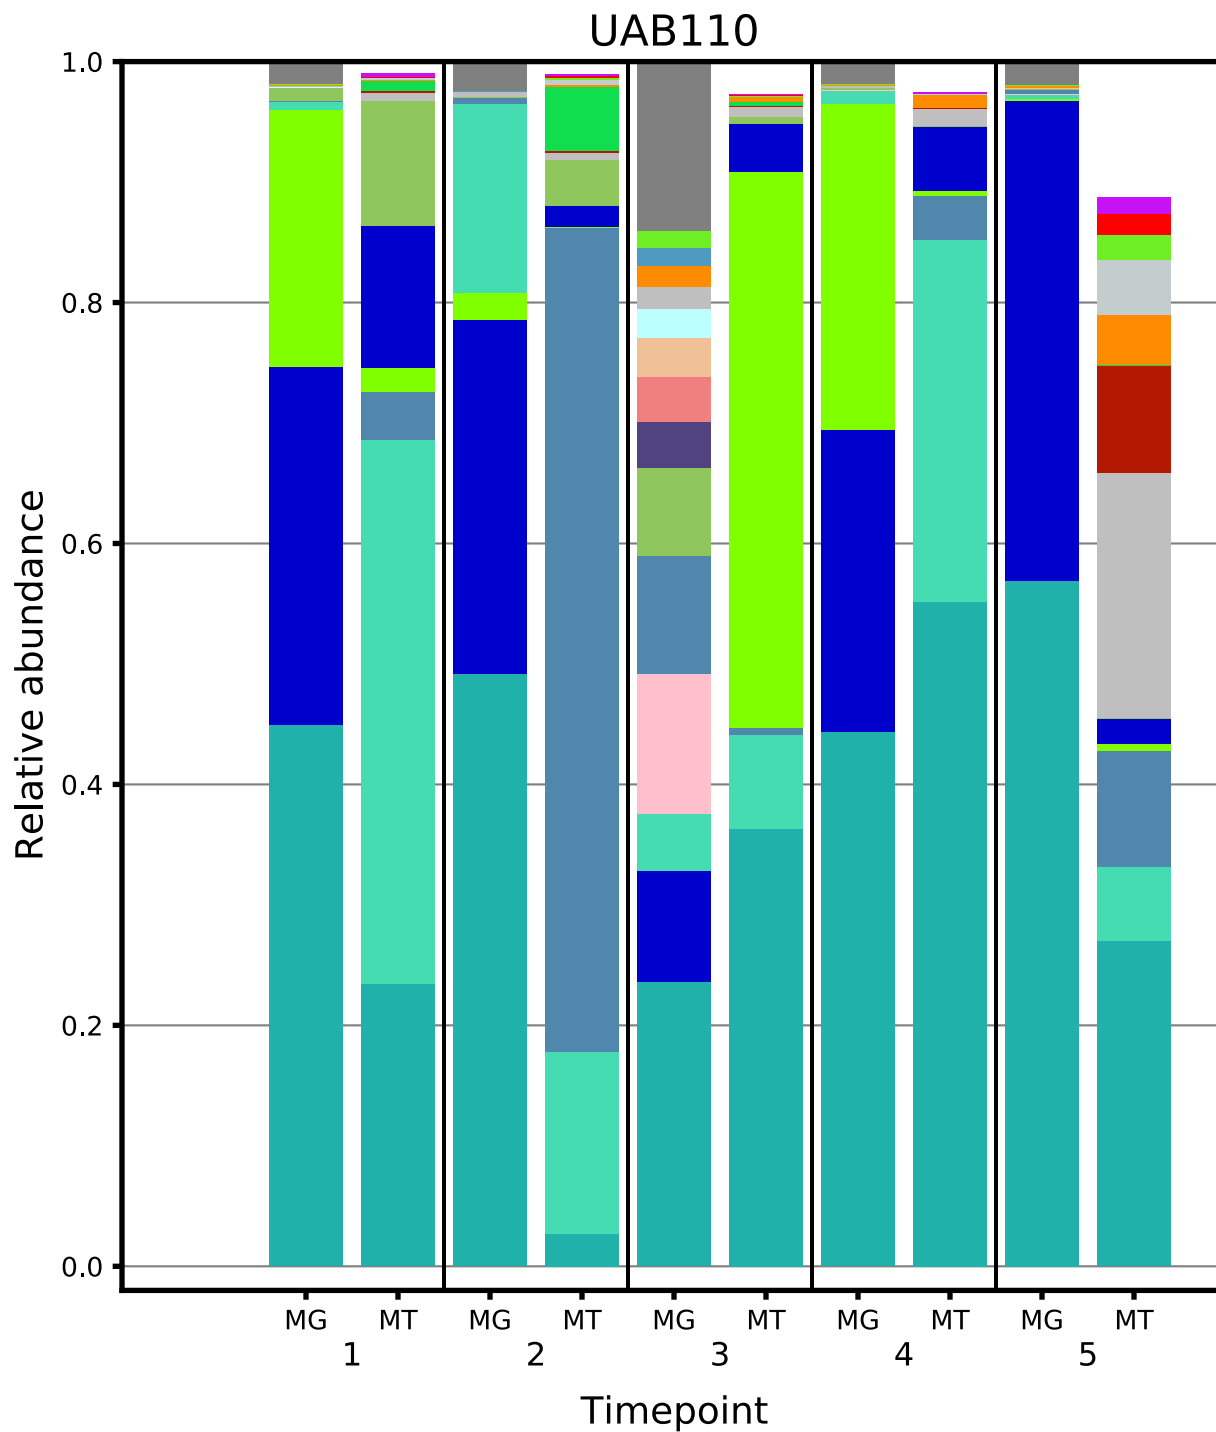

### Phylotype

- Gardnerella\_vaginalis
- Atopobium\_vaginae
- Sneathia\_amnii
- Prevotella\_amnii
- Mobiluncus\_mulieris
- Propionibacterium\_sp.
- Lactobacillus\_iners
- Mageeibacillus\_indolicus
- Sneathia\_sanguinegens
- Prevotella\_timonensis
- Prevotella\_sp.
- BVAB1
- Porphyromonas\_uenonis
- Megasphaera\_genomosp.
- Ruminococcus\_lactaris
- Prevotella\_bivia
- Megasphaera\_micronuciformis
- Prevotella\_buccalis
- other

### UAB116

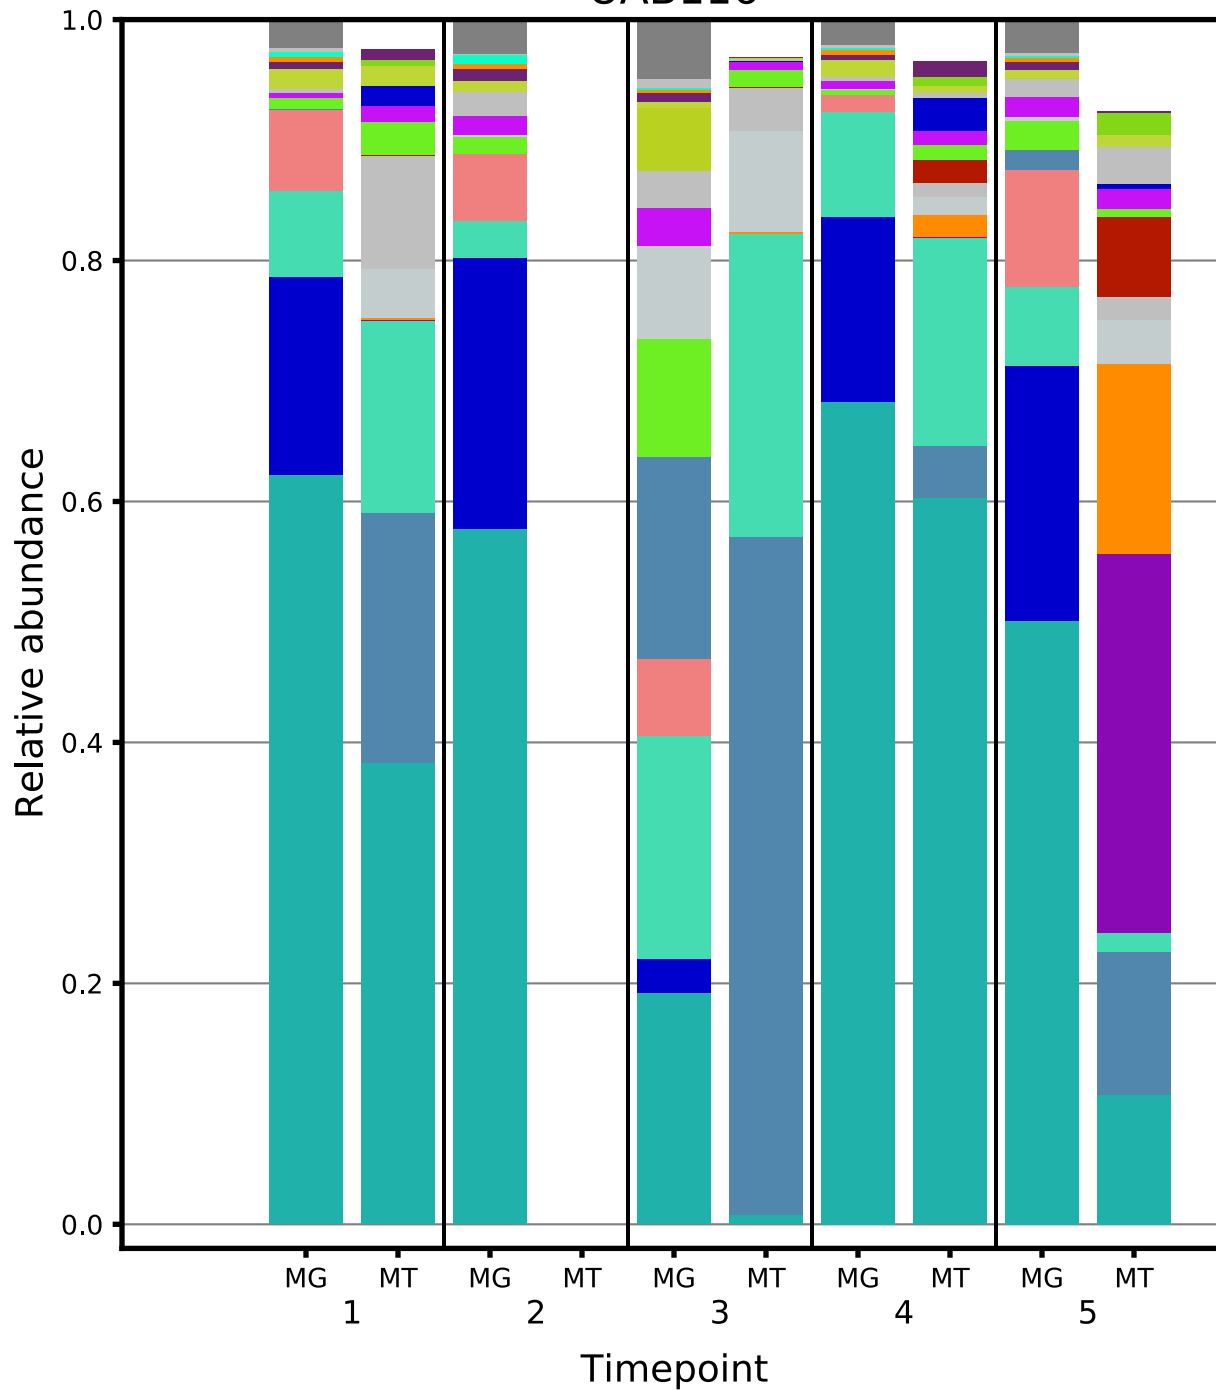

- Phylotype
- Lactobacillus\_iners
  - Gardnerella\_vaginalis
  - Finegoldia\_magna
  - Propionibacterium\_sp.
  - BVAB1
  - Streptococcus\_anginosus
  - Prevotella\_bivia
  - Peptoniphilus\_harei
  - Lactobacillus\_crispatus
  - Corynebacterium\_amycolatum
  - Prevotella\_timonensis
  - Staphylococcus\_haemolyticus
  - Sneathia\_amnii
  - Atopobium\_vaginae
  - Lactobacillus\_gasseri
  - Staphylococcus\_epidermidis
  - Prevotella\_sp.
  - Lactobacillus\_jensenii
  - Corynebacterium\_aurimucosum
  - Prevotella\_buccalis
  - Lactobacillus\_vaginalis
  - Sneathia\_sanguinegens
  - Anaerococcus\_tetradus
  - other

### UAB117

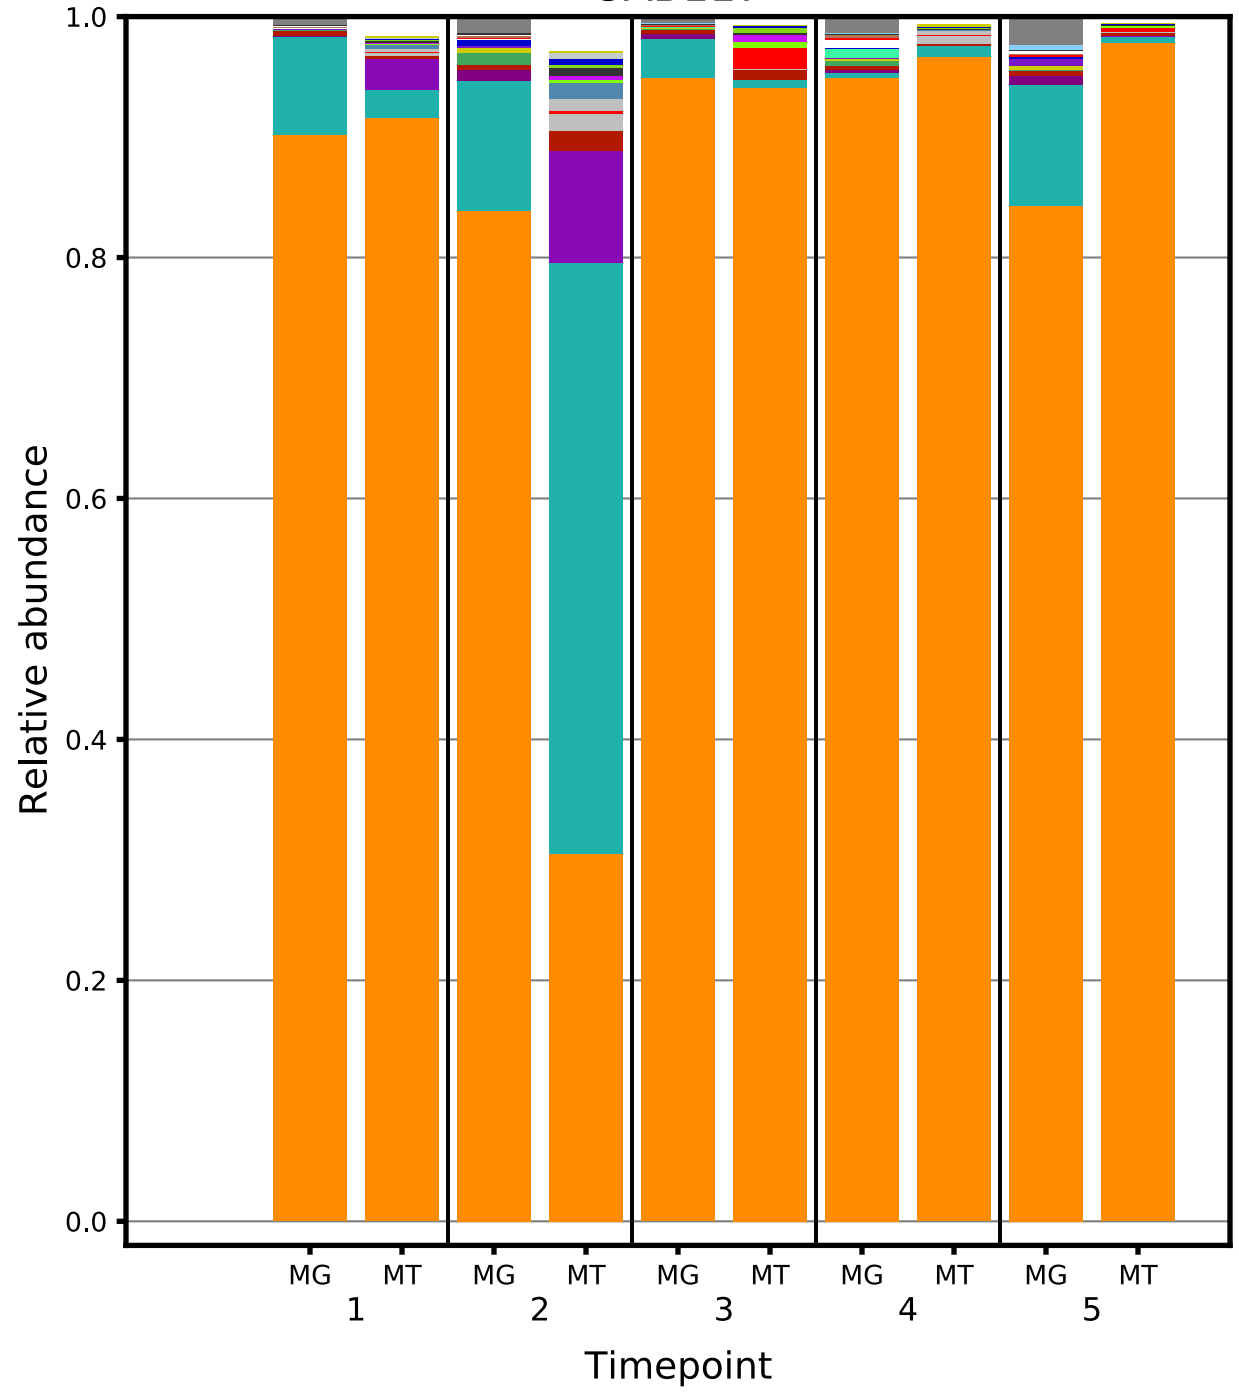





### Phylotype

- Bifidobacterium\_breve
- Lactobacillus\_iners
- BVAB1
- Gardnerella\_vaginalis
- Bifidobacterium\_longum
- Corynebacterium\_amycolatum
- Sneathia\_amnii
- Corynebacterium\_jeikeium
- Staphylococcus\_epidermidis
- Corynebacterium\_pseudogenitalium
- Prevotella\_bivia
- Corynebacterium\_aurimucosum
- Sneathia\_sanguinegens
- Streptococcus\_agalactiae
- Prevotella\_timonensis
- Finegoldia\_magna
- Propionibacterium\_sp.
- Brevibacterium\_mcbrellneri
- Prevotella\_buccalis
- Megasphaera\_genomosp.
- Gemella\_haemolysans
- Prevotella\_amnii
- Enterococcus\_faecalis
- other

### UAB129

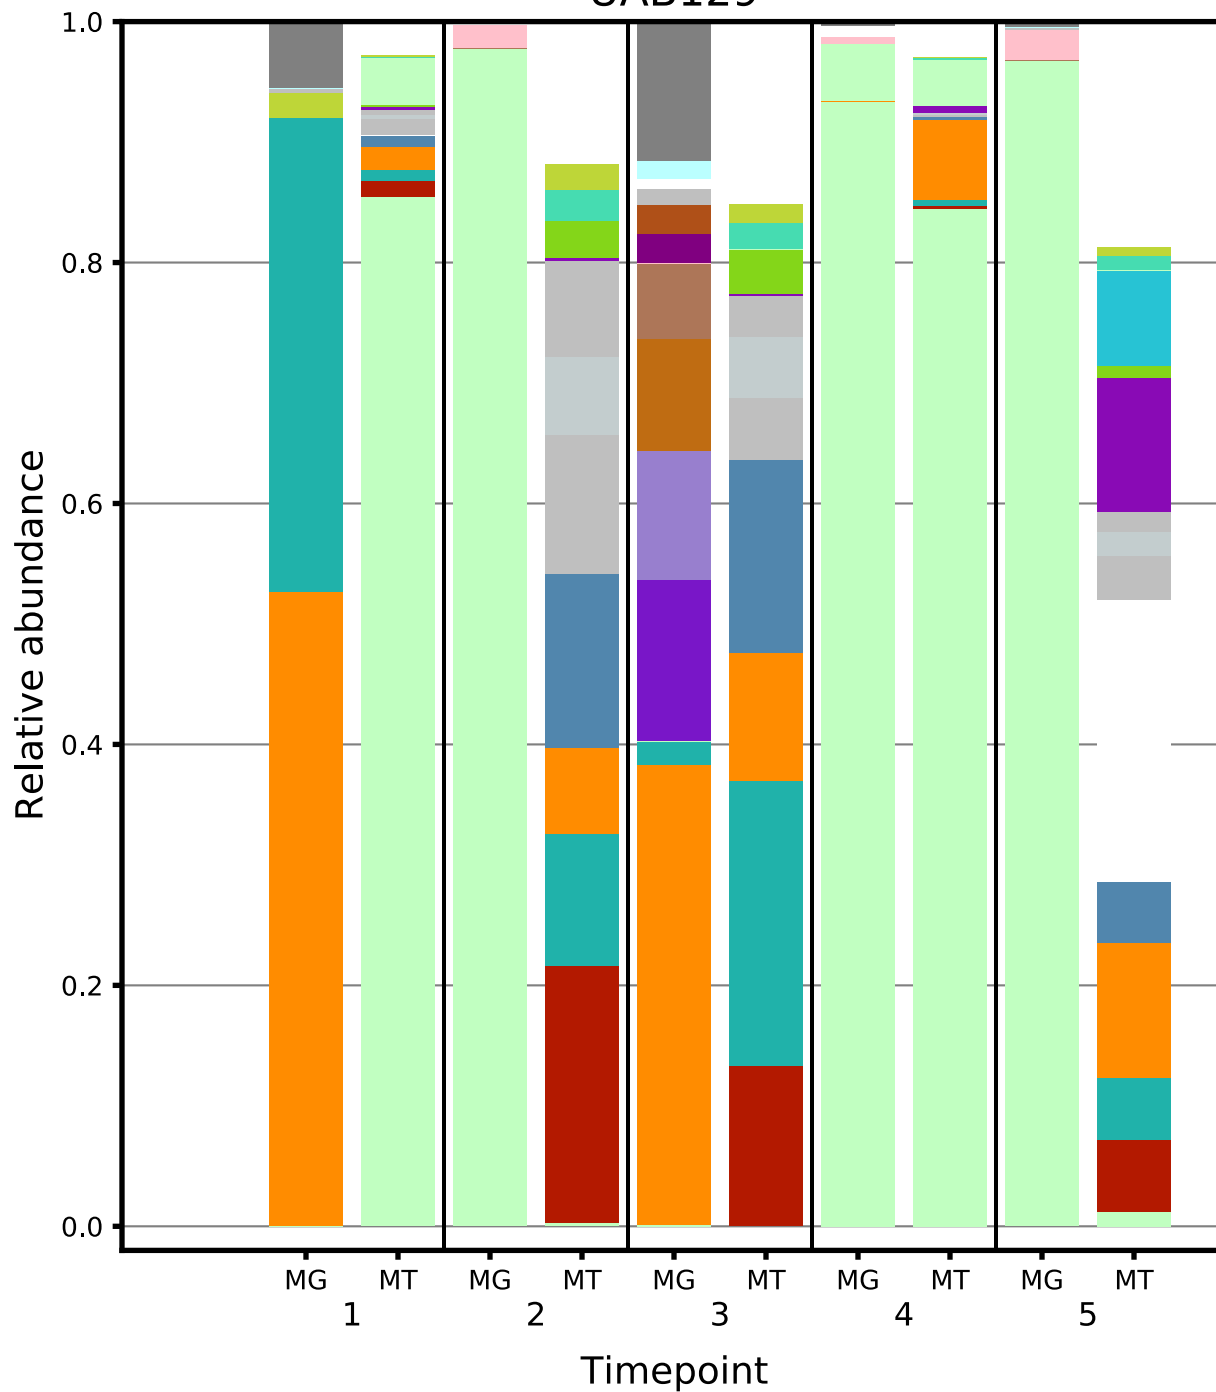

Supplement: 13059_2022_2635_MOESM1_ESM.pdf [file 13059_2022_2635_MOESM1_ESM.pdf]
